# Supplementary material
Source: PubMed Central journal article supplement (PMC6928422)
Supplement: NIHMS1533985-supplement-Supp_1.pdf [file NIHMS1533985-supplement-Supp_1.pdf]

## FACT-G (Version 4)

Below is a list of statements that other people with your illness have said are important. **Please circle or mark one number per line to indicate your response as it applies to the past 7 days.**

### PHYSICAL WELL-BEING

|     |                                                                                       | Not<br>at all | A little<br>bit | Some-<br>what | Quite<br>a bit | Very<br>much |
|-----|---------------------------------------------------------------------------------------|---------------|-----------------|---------------|----------------|--------------|
| GP1 | I have a lack of energy .....                                                         | 0             | 1               | 2             | 3              | 4            |
| GP2 | I have nausea .....                                                                   | 0             | 1               | 2             | 3              | 4            |
| GP3 | Because of my physical condition, I have trouble meeting the needs of my family ..... | 0             | 1               | 2             | 3              | 4            |
| GP4 | I have pain .....                                                                     | 0             | 1               | 2             | 3              | 4            |
| GP5 | I am bothered by side effects of treatment .....                                      | 0             | 1               | 2             | 3              | 4            |
| GP6 | I feel ill .....                                                                      | 0             | 1               | 2             | 3              | 4            |
| GP7 | I am forced to spend time in bed .....                                                | 0             | 1               | 2             | 3              | 4            |

### SOCIAL/FAMILY WELL-BEING

|     |                                                                                                                                                                                                             | Not<br>at all | A little<br>bit | Some-<br>what | Quite<br>a bit | Very<br>much |
|-----|-------------------------------------------------------------------------------------------------------------------------------------------------------------------------------------------------------------|---------------|-----------------|---------------|----------------|--------------|
| GS1 | I feel close to my friends .....                                                                                                                                                                            | 0             | 1               | 2             | 3              | 4            |
| GS2 | I get emotional support from my family .....                                                                                                                                                                | 0             | 1               | 2             | 3              | 4            |
| GS3 | I get support from my friends.....                                                                                                                                                                          | 0             | 1               | 2             | 3              | 4            |
| GS4 | My family has accepted my illness .....                                                                                                                                                                     | 0             | 1               | 2             | 3              | 4            |
| GS5 | I am satisfied with family communication about my illness.....                                                                                                                                              | 0             | 1               | 2             | 3              | 4            |
| GS6 | I feel close to my partner (or the person who is my main support) .....                                                                                                                                     | 0             | 1               | 2             | 3              | 4            |
| Q1  | <i>Regardless of your current level of sexual activity, please answer the following question. If you prefer not to answer it, please mark this box <input type="checkbox"/> and go to the next section.</i> |               |                 |               |                |              |
| GS7 | I am satisfied with my sex life .....                                                                                                                                                                       | 0             | 1               | 2             | 3              | 4            |

## FACT-G (Version 4)

Please circle or mark one number per line to indicate your response as it applies to the past 7 days.

### EMOTIONAL WELL-BEING

|     |                                                          | Not<br>at all | A little<br>bit | Some-<br>what | Quite<br>a bit | Very<br>much |
|-----|----------------------------------------------------------|---------------|-----------------|---------------|----------------|--------------|
| GE1 | I feel sad .....                                         | 0             | 1               | 2             | 3              | 4            |
| GE2 | I am satisfied with how I am coping with my illness..... | 0             | 1               | 2             | 3              | 4            |
| GE3 | I am losing hope in the fight against my illness.....    | 0             | 1               | 2             | 3              | 4            |
| GE4 | I feel nervous.....                                      | 0             | 1               | 2             | 3              | 4            |
| GE5 | I worry about dying.....                                 | 0             | 1               | 2             | 3              | 4            |
| GE6 | I worry that my condition will get worse.....            | 0             | 1               | 2             | 3              | 4            |

### FUNCTIONAL WELL-BEING

|     |                                                         | Not<br>at all | A little<br>bit | Some-<br>what | Quite<br>a bit | Very<br>much |
|-----|---------------------------------------------------------|---------------|-----------------|---------------|----------------|--------------|
| GF1 | I am able to work (include work at home) .....          | 0             | 1               | 2             | 3              | 4            |
| GF2 | My work (include work at home) is fulfilling.....       | 0             | 1               | 2             | 3              | 4            |
| GF3 | I am able to enjoy life.....                            | 0             | 1               | 2             | 3              | 4            |
| GF4 | I have accepted my illness.....                         | 0             | 1               | 2             | 3              | 4            |
| GF5 | I am sleeping well .....                                | 0             | 1               | 2             | 3              | 4            |
| GF6 | I am enjoying the things I usually do for fun .....     | 0             | 1               | 2             | 3              | 4            |
| GF7 | I am content with the quality of my life right now..... | 0             | 1               | 2             | 3              | 4            |
