# Supplementary material
Source: PubMed Central journal article supplement (PMC6928422)
Supplement: NIHMS1533985-supplement-Supp_2.pdf [file NIHMS1533985-supplement-Supp_2.pdf]

## Global Health

Please respond to each question or statement by marking one box per row.

|           |                                                                                                                                                                                                                                        | Excellent                     | Very good                     | Good                          | Fair                          | Poor                          |
|-----------|----------------------------------------------------------------------------------------------------------------------------------------------------------------------------------------------------------------------------------------|-------------------------------|-------------------------------|-------------------------------|-------------------------------|-------------------------------|
| Global01  | In general, would you say your health is: .....                                                                                                                                                                                        | <input type="checkbox"/><br>5 | <input type="checkbox"/><br>4 | <input type="checkbox"/><br>3 | <input type="checkbox"/><br>2 | <input type="checkbox"/><br>1 |
| Global02  | In general, would you say your quality of life is:.....                                                                                                                                                                                | <input type="checkbox"/><br>5 | <input type="checkbox"/><br>4 | <input type="checkbox"/><br>3 | <input type="checkbox"/><br>2 | <input type="checkbox"/><br>1 |
| Global03  | In general, how would you rate your physical health? .....                                                                                                                                                                             | <input type="checkbox"/><br>5 | <input type="checkbox"/><br>4 | <input type="checkbox"/><br>3 | <input type="checkbox"/><br>2 | <input type="checkbox"/><br>1 |
| Global04  | In general, how would you rate your mental health, including your mood and your ability to think? .....                                                                                                                                | <input type="checkbox"/><br>5 | <input type="checkbox"/><br>4 | <input type="checkbox"/><br>3 | <input type="checkbox"/><br>2 | <input type="checkbox"/><br>1 |
| Global05  | In general, how would you rate your satisfaction with your social activities and relationships? .....                                                                                                                                  | <input type="checkbox"/><br>5 | <input type="checkbox"/><br>4 | <input type="checkbox"/><br>3 | <input type="checkbox"/><br>2 | <input type="checkbox"/><br>1 |
| Global09r | In general, please rate how well you carry out your usual social activities and roles. (This includes activities at home, at work and in your community, and responsibilities as a parent, child, spouse, employee, friend, etc.)..... | <input type="checkbox"/><br>5 | <input type="checkbox"/><br>4 | <input type="checkbox"/><br>3 | <input type="checkbox"/><br>2 | <input type="checkbox"/><br>1 |
|           |                                                                                                                                                                                                                                        | Completely                    | Mostly                        | Moderately                    | A little                      | Not at all                    |
| Global06  | To what extent are you able to carry out your everyday physical activities such as walking, climbing stairs, carrying groceries, or moving a chair? .....                                                                              | <input type="checkbox"/><br>5 | <input type="checkbox"/><br>4 | <input type="checkbox"/><br>3 | <input type="checkbox"/><br>2 | <input type="checkbox"/><br>1 |

**In the past 7 days...**

|           |                                                                                                               | <b>Never</b>                             | <b>Rarely</b>                 | <b>Sometimes</b>              | <b>Often</b>                  | <b>Always</b>                 |                               |                               |                               |                               |                               |                                                         |
|-----------|---------------------------------------------------------------------------------------------------------------|------------------------------------------|-------------------------------|-------------------------------|-------------------------------|-------------------------------|-------------------------------|-------------------------------|-------------------------------|-------------------------------|-------------------------------|---------------------------------------------------------|
| Global10r | How often have you been bothered by emotional problems such as feeling anxious, depressed or irritable? ..... | <input type="checkbox"/><br>5            | <input type="checkbox"/><br>4 | <input type="checkbox"/><br>3 | <input type="checkbox"/><br>2 | <input type="checkbox"/><br>1 |                               |                               |                               |                               |                               |                                                         |
|           |                                                                                                               | <b>None</b>                              | <b>Mild</b>                   | <b>Moderate</b>               | <b>Severe</b>                 | <b>Very severe</b>            |                               |                               |                               |                               |                               |                                                         |
| Global08r | How would you rate your fatigue on average? .....                                                             | <input type="checkbox"/><br>5            | <input type="checkbox"/><br>4 | <input type="checkbox"/><br>3 | <input type="checkbox"/><br>2 | <input type="checkbox"/><br>1 |                               |                               |                               |                               |                               |                                                         |
| Global07r | How would you rate your pain on average? .....                                                                | <input type="checkbox"/><br>0<br>No pain | <input type="checkbox"/><br>1 | <input type="checkbox"/><br>2 | <input type="checkbox"/><br>3 | <input type="checkbox"/><br>4 | <input type="checkbox"/><br>5 | <input type="checkbox"/><br>6 | <input type="checkbox"/><br>7 | <input type="checkbox"/><br>8 | <input type="checkbox"/><br>9 | <input type="checkbox"/><br>10<br>Worst pain imaginable |
